# Supplementary material for: Accuracy of the ultrasound attenuation coefficient for the evaluation of hepatic steatosis: a systematic review and meta-analysis of prospective studies
Source: PubMed Central journal article supplement — Ultrasonography. 2021 Jun 1;41(1):83–92. doi: 10.14366/usg.21076 (PMC8696131; doi:10.14366/usg.21076), 2021-06-01
Supplement: usg-21076-supple1.pdf [file usg-21076-supple1.pdf]

**Supplementary Table 1. Search terms for MEDLINE, EMBASE, and Cochrane Library**

| Search | Query for MEDLINE                                                                                                          |
|--------|----------------------------------------------------------------------------------------------------------------------------|
| #1     | "Fatty Liver"[Mesh]                                                                                                        |
| #2     | (Liver*[TW] OR hepat*[TW]) AND (Fatty[TW] OR steatos*[TW])                                                                 |
| #3     | Steatohepat*[TW] OR NAFLD[TW] OR NASH[TW]                                                                                  |
| #4     | #1 OR #2 OR #3                                                                                                             |
| #5     | "Ultrasonography"[Mesh]                                                                                                    |
| #6     | Ultrasound*[TW] OR Ultrason*[TW] OR Ultra-sound*[TW] OR Ultra-son*[TW] OR echograp*[TW] OR Echotomograp*[TW] OR "US"[TIAB] |
| #7     | #5 OR #6                                                                                                                   |
| #8     | Attenuation*[TW] OR ATI[TW]                                                                                                |
| #9     | #7 AND #8                                                                                                                  |
| #10    | Attenuation-imag*[TW] OR Attenuation-techniq*[TW] OR attenuation-coefficient*[TW] OR Attenuation-paramet*[TW]              |
| #11    | #9 OR #10                                                                                                                  |
| #12    | #4 AND #11                                                                                                                 |
| #13    | #12 AND English[Lang]                                                                                                      |
| Search | Query for EMBASE                                                                                                           |
| #1     | 'fatty liver'/exp                                                                                                          |
| #2     | ((Liver* OR hepat*) NEAR/6 (Fatty OR steatos*)):ab,ti,kw                                                                   |
| #3     | (Steatohepat* OR NAFLD OR NASH):ab,ti,kw                                                                                   |
| #4     | #1 OR #2 OR #3                                                                                                             |
| #5     | 'echography'/exp                                                                                                           |
| #6     | (Ultrasound* OR Ultrason* OR Ultra-sound* OR Ultra-son* OR echograp* OR Echotomograp* OR 'US'):ab,ti,kw                    |
| #7     | #5 OR #6                                                                                                                   |
| #8     | (Attenuation* OR ATI):ab,ti,kw                                                                                             |
| #9     | #7 AND #8                                                                                                                  |
| #10    | (Attenuation* NEAR/3 (imag* OR techniq* OR coefficient* OR Multiparamet* OR paramet*)):ab,ti,kw                            |
| #11    | #9 OR #10                                                                                                                  |
| #12    | #4 AND #11                                                                                                                 |
| #13    | #12 AND [english]/lim                                                                                                      |
| #14    | #13 AND ([article]/lim OR [article in press]/lim OR [review]/lim)                                                          |
| Search | Query for Cochran Library                                                                                                  |
| #1     | [mh "Fatty Liver"]                                                                                                         |
| #2     | ((Liver* or hepat*) near/6 (Fatty or steatos*)):ab,ti,kw                                                                   |
| #3     | (Steatohepat* or NAFLD or NASH):ab,ti,kw                                                                                   |
| #4     | #1 or #2 or #3                                                                                                             |
| #5     | [mh "Ultrasonography"]                                                                                                     |
| #6     | (Ultrasound* or Ultrason* or Ultra-sound* or Ultra-son* or echograp* or Echotomograp* or "US"):ab,ti,kw                    |
| #7     | #5 or #6                                                                                                                   |
| #8     | attenuation*:ab,ti,kw or ATI:ab,ti,kw                                                                                      |
| #9     | #7 and #8                                                                                                                  |
| #10    | (Attenuation* near/3 (imag* or techniq* or coefficient* or Multiparamet* or paramet*)):ab,ti,kw                            |
| #11    | #9 or #10                                                                                                                  |
| #12    | #4 and #11                                                                                                                 |
| #13    | #12 in Reviews, Trials                                                                                                     |
