# Supplementary material for: Accuracy of the ultrasound attenuation coefficient for the evaluation of hepatic steatosis: a systematic review and meta-analysis of prospective studies
Source: PubMed Central journal article supplement — Ultrasonography. 2021 Jun 1;41(1):83–92. doi: 10.14366/usg.21076 (PMC8696131; doi:10.14366/usg.21076), 2021-06-01
Supplement: usg-21076-supple2.pdf [file usg-21076-supple2.pdf]

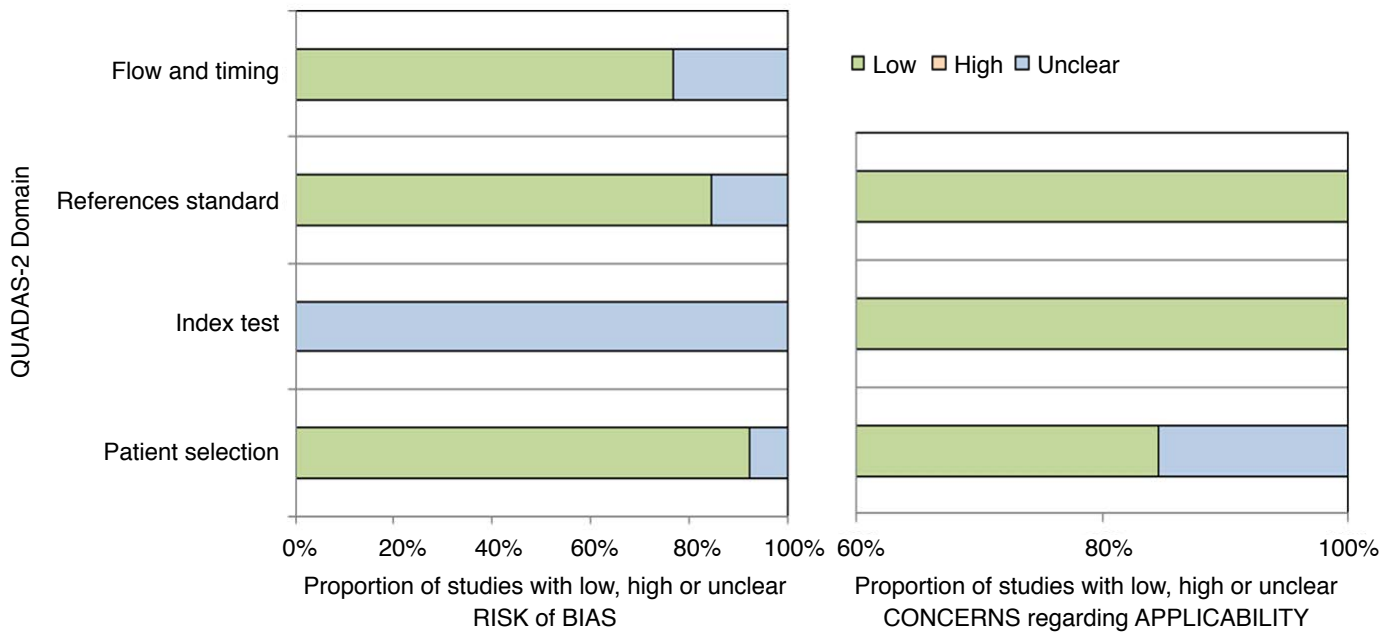

Supplementary Fig. 1. Quality assessment of the included studies based on the QUADAS-2 method.

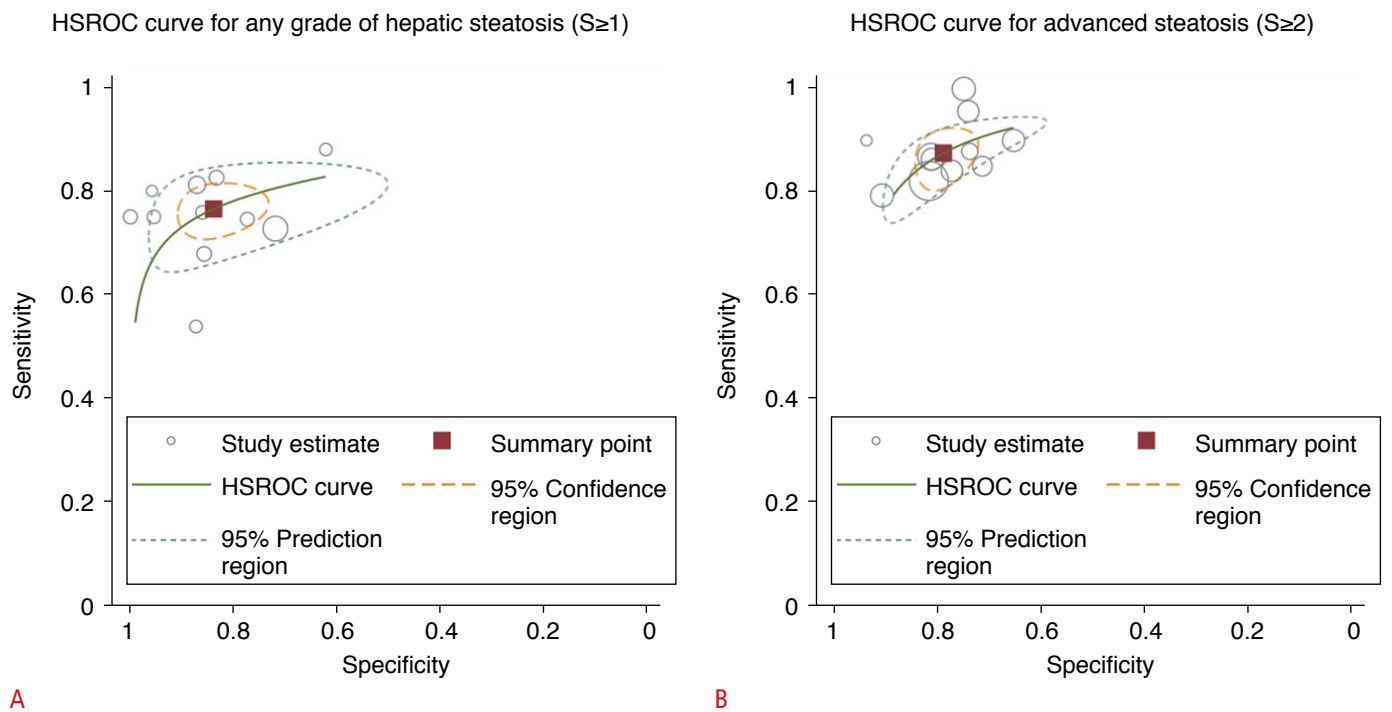

Supplementary Fig. 2. Hierarchical summary receiver operating characteristics (HSROC) curves. HSROC curves for any grade of hepatic steatosis ( $S \geq 1$ ) (A) and advanced steatosis ( $S \geq 2$ ) (B) are shown.
