# Supplementary material for: Accuracy of the ultrasound attenuation coefficient for the evaluation of hepatic steatosis: a systematic review and meta-analysis of prospective studies
Source: PubMed Central journal article supplement — Ultrasonography. 2021 Jun 1;41(1):83–92. doi: 10.14366/usg.21076 (PMC8696131; doi:10.14366/usg.21076), 2021-06-01
Supplement: usg-21076-supple3.pdf [file usg-21076-supple3.pdf]

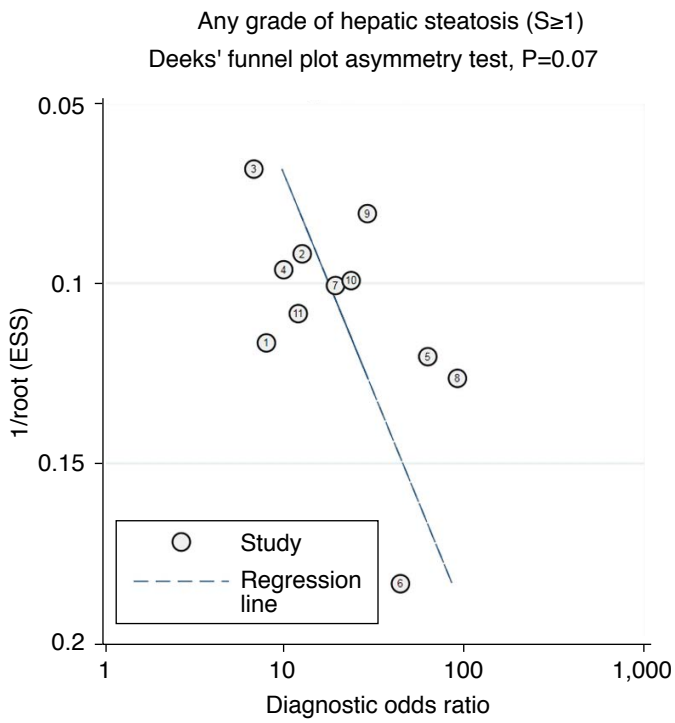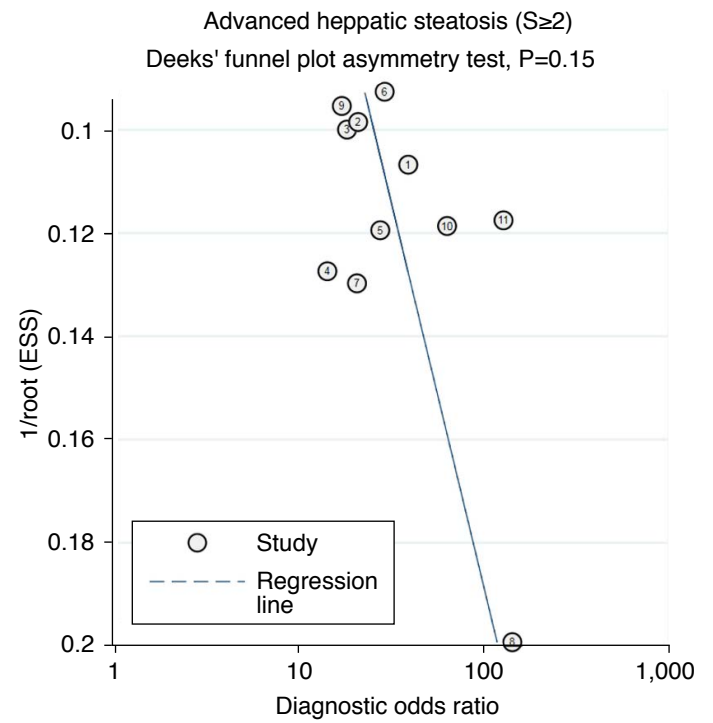

A

B

Supplementary Fig. 3. Deek's funnel plot asymmetry test.

Deek's funnel plot asymmetry tests for any grade of hepatic steatosis ( $S \geq 1$ ) (A) and advanced hepatic steatosis ( $S \geq 2$ ) (B) are shown.
